# Supplementary material
Source: publisher site journal article supplement (https://www.e-cmh.org/upload/media/cmh-2022-0330-Supplementary-9.pdf)
Supplement: Supplementary file 1 [file cmh-2022-0330-Supplementary-9.pdf]

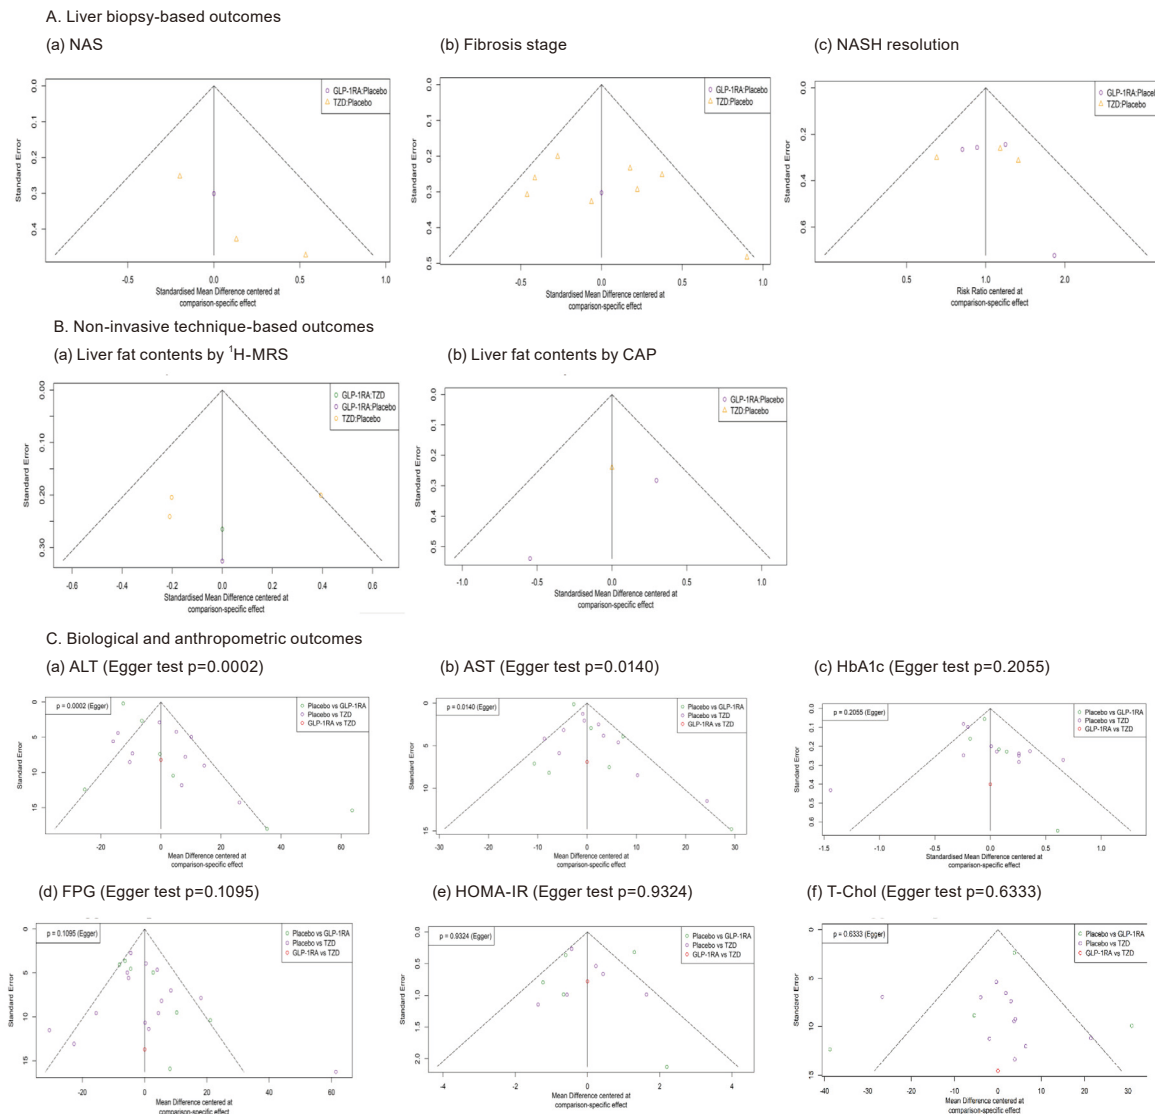

**Supplementary Material 9.** Evaluation of publication bias. Funnel plots and Egger test values. (A) Liver biopsy-based outcomes; (B) Non-invasive technique-based outcomes; (C) Biological and anthropometric outcomes. The Egger test value was computed when the outcome included at least ten studies for analysis. ALT, alanine aminotransferase; AST, aspartate aminotransferase; BMI, body mass index; CAP, controlled attenuation parameter; FPG, fasting plasma glucose; GLP-1RA, glucagon-like peptide-1 receptor agonist; <sup>1</sup>H-MRS, proton magnetic resonance spectroscopy; HOMA-IR, homeostasis model assessment of insulin resistance; LDL-C, low-density lipoprotein-cholesterol; NAFLD, nonalcoholic fatty liver disease; NAS, nonalcoholic fatty liver activity score; NASH, nonalcoholic steatohepatitis; T-Chol, total cholesterol; TG, triglyceride; TZD, thiazolidinedione; WC, waist circumference.

(g) LDL-C (Egger test  $p=0.9981$ )

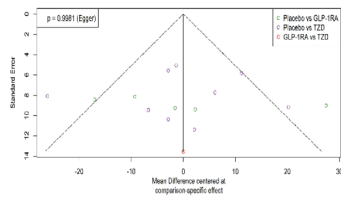

(h) TG (Egger test  $p=0.3281$ )

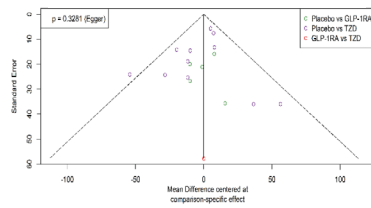

(i) BMI (Egger test  $p=0.7659$ )

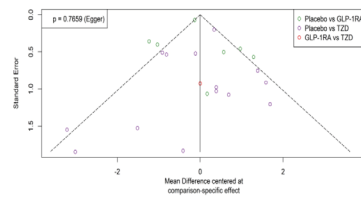

(j) WC (Egger test  $p=0.3080$ )

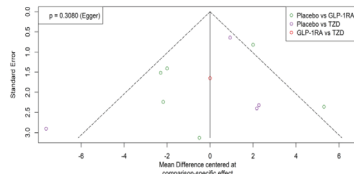

Supplementary Material 9. Continued
